# Supplementary material for: Lysosomal Changes in Mitosis
Source: MDPI journal article supplement (doi:10.3390/cells11050875), 2022-03-03
Supplement: s1 [file s1]

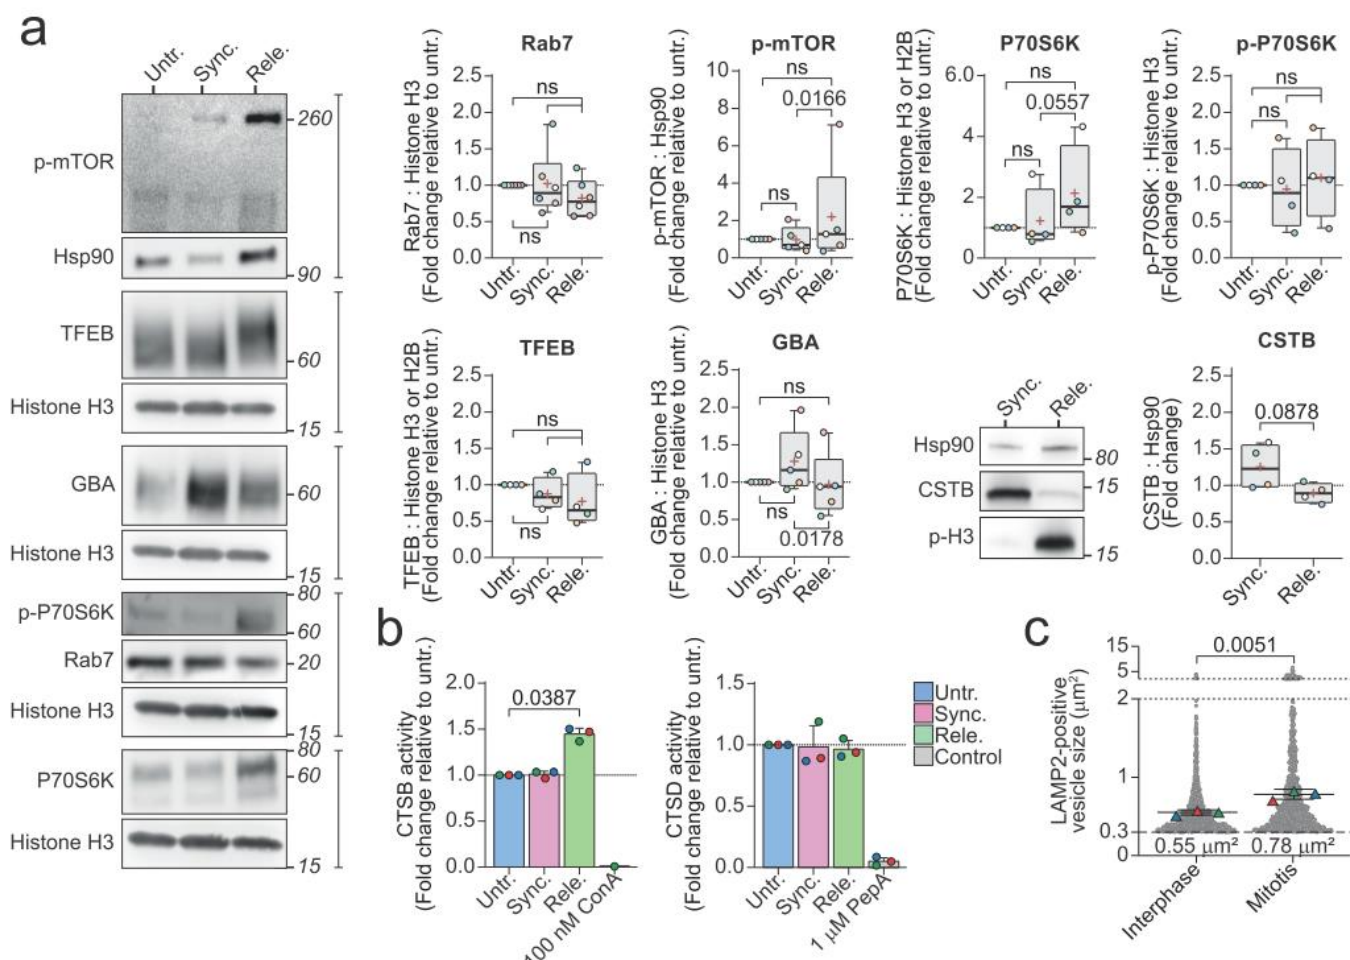

**Supplementary figure S1.** Western blotting, enzymatic assays, and measurement of LAMP2-positive vesicle size. **(a)** Rep-representative immunoblotting of lysosomal proteins and CSTB in untreated, synchronized, and released U2OS cells and the quantification of band intensities normalized to respective loading controls, showed as fold change vs untreated. **(b)** Measurement of cathepsin B and D activity in untreated, synchronized, and released U2OS cells. Pepstatin A and ConA were used as positive controls for CTSD and CTSB activity, respectively. **(c)** Measurement of individual LAMP2-positive vesicle area in asynchronous U2OS cells, performed as in figure 2b but using another particle size cutoff-value of  $0.3 \mu\text{m}^2$ -infinity. The mean LAMP2-positive vesicle size is shown beneath each plot. All experiments were performed at least three times ( $n \geq 3$ ) and different colors symbolize each biological replicate. Statistical analyses were performed on the average values using paired **(a)** or unpaired **(b)** t-test. P-values are stated in the figures. Abbreviations: ConA, concanamycin A; CSTB, Cystatin B protease inhibitor; CTSD, cathepsin D; GBA,  $\beta$ -glucocerebro-sidase; LAMP1/2, lysosomal associated membrane protein 1/2; mTOR, mechanistic target of rapamycin; PepA, Pepstatin A; P70S6K, ribosomal protein S6 kinase; p-H3, phospho-S10-histone H3; TFEB, transcription factor EB; V-ATPase, vac-uolar type ATPase.

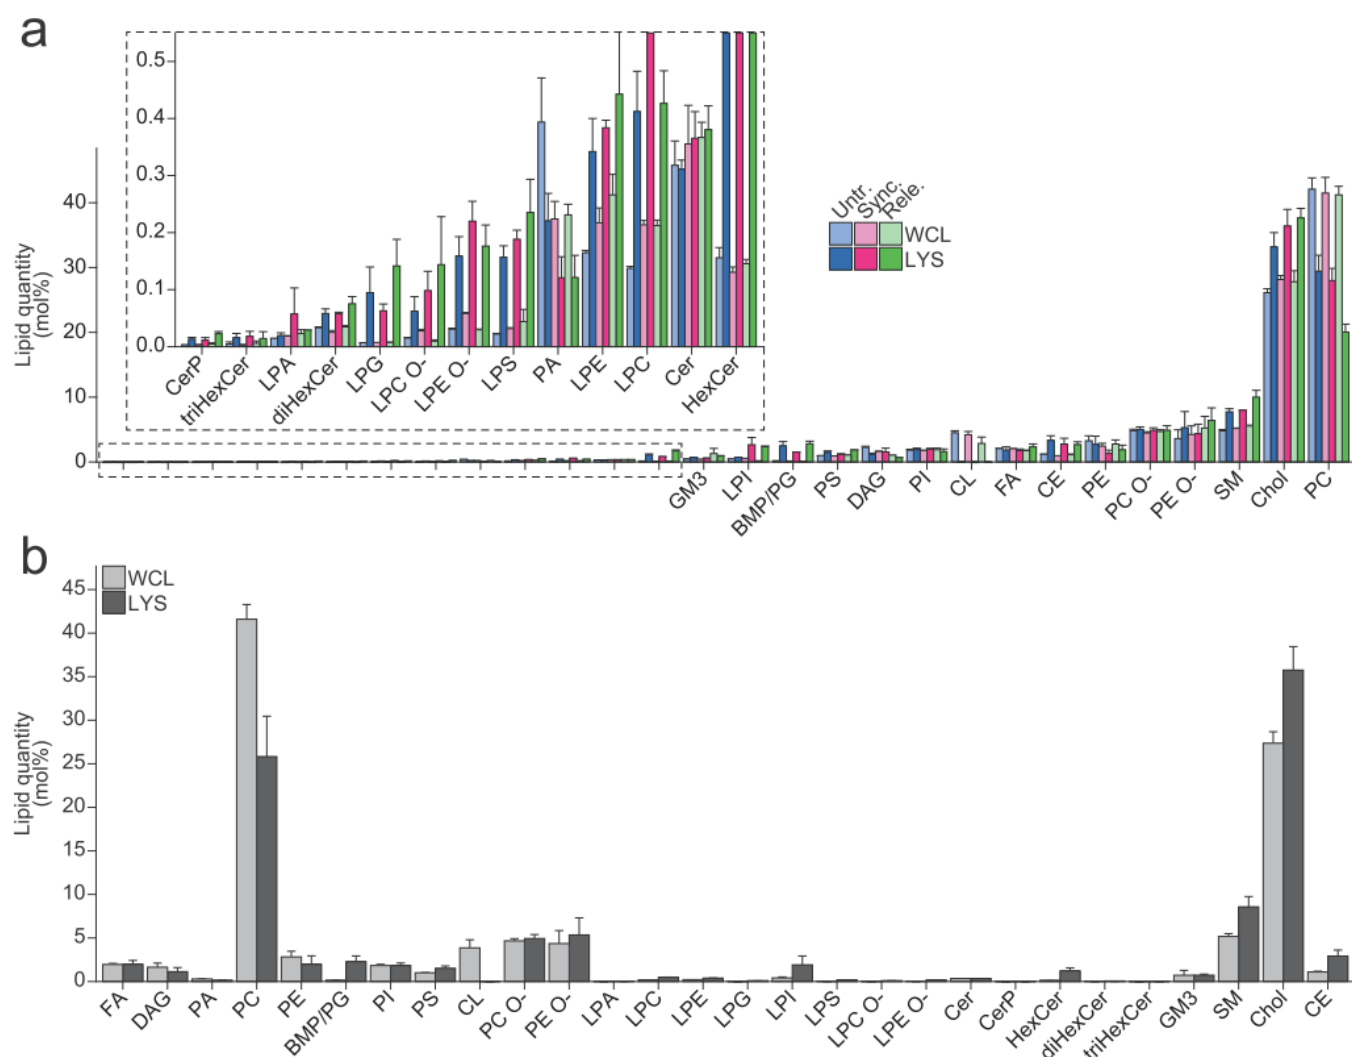

**Supplementary figure S2.** Quantities of lipid classes. **(a)** Quantities of lipid classes determined for all sample types of whole cell lysates (WCLs) and lysosomal fractions (LYSs). **(b)** Quantities of lipid classes averaged for all WCLs and all LYSs.

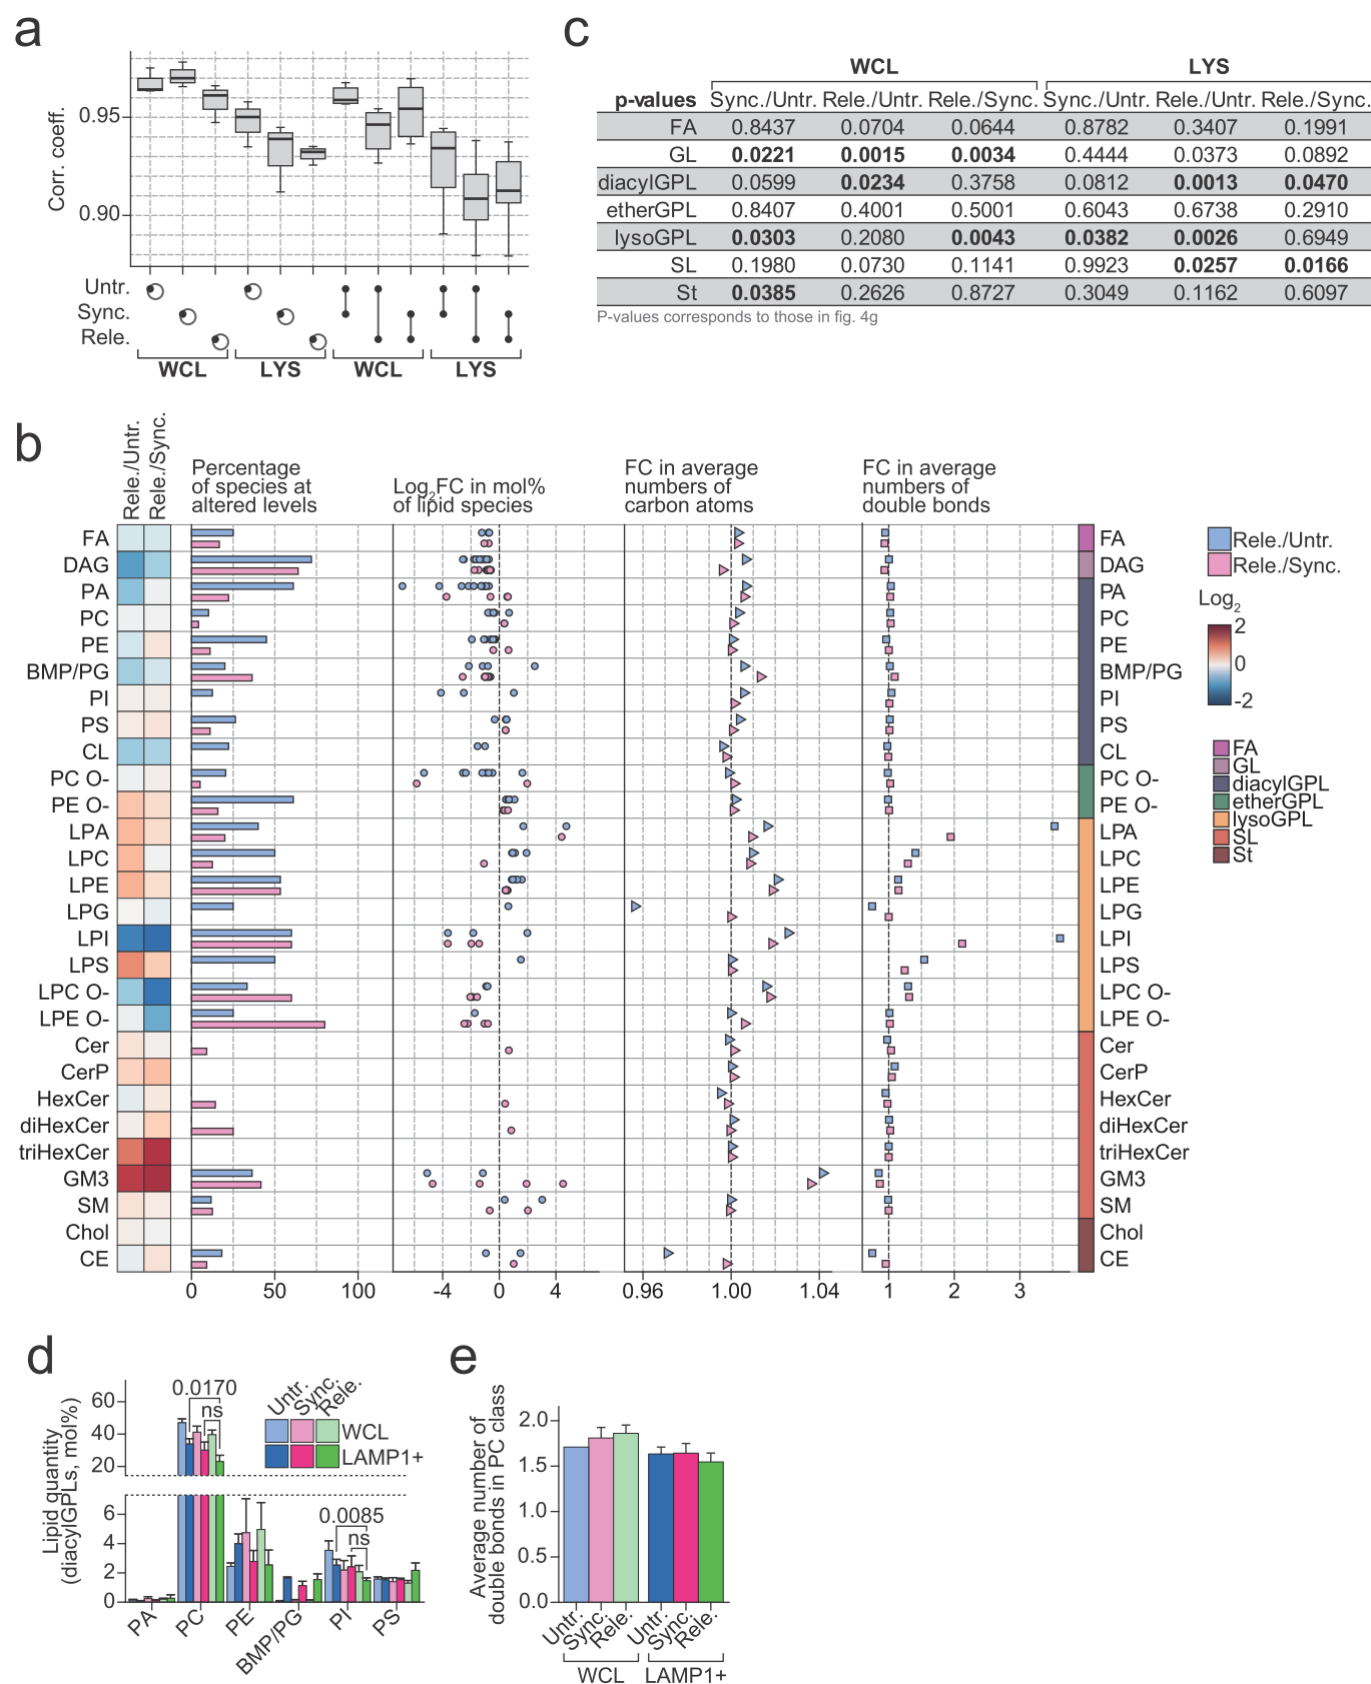

**Supplementary figure S3.** Additional analyses of lipidomics data. **(a)** Spearman correlation coefficients between replicas or between different sample types calculated based on the acquired quantitative lipid profiles as in figure 4a, but grouped into individual comparisons. **(b)** Lipid profiles of whole cell lysates (WCLs) of released cells relative to controls. *From left to right:* A heatmap of fold changes ( $\log_2$ ) of lipid classes; percentage of lipid species in each lipid class found at statistically significantly different levels by linear modelling; fold change ( $\log_2$ ) estimated for the significantly

---

changed lipid species; fold change of average number of carbon atoms in each lipid class; fold change of average number of double bonds in each lipid class. **(c)** *P*-values presented and omitted in figure 4g. **(d)** Levels of diacylGPL classes in WCLs and purified LAMP1-positive compartments. **(e)** Average number of double bonds in the lipid class PC in WCLs and purified LAMP1-positive compartments. All experiments were performed three times (n=3). Abbreviations: BMP, bis(monoacyl)glycerophosphate; LAMP1, Lysosomal-associated membrane protein 1; PA, phosphatidic acid; PC, phosphatidylcholine; PE, phosphatidylethanolamine; PG, phosphatidylglycerol; PI, phosphatidylinositol; PS, phosphatidylserine.

**Table S1.** Antibody information

| <b>Antibody</b>                                      | <b>Species</b> | <b>Identifier</b>                | <b>Dilution</b> |
|------------------------------------------------------|----------------|----------------------------------|-----------------|
| ASM                                                  | Mouse          | Abcam #ab74281                   | 1:1000          |
| CTSB                                                 | Mouse          | Sigma #C6243                     | 1:1000          |
| CTSD                                                 | Mouse          | Abcam #ab6313                    | 1:1000          |
| EEA1                                                 | Rabbit         | Abcam # ab2900                   | 1:1000          |
| GBA                                                  | Rabbit         | Sigma #G4046                     | 1:1000          |
| Golgin97                                             | Rabbit         | Abcam # ab84340                  | 1:2000          |
| Histone H3                                           | Rabbit         | Abcam # ab18521                  | 1:1000          |
| Hsp90                                                | Mouse          | BD transduction #610418          | 1:1000          |
| LAMP1                                                | Rabbit         | Abcam #ab24170                   | 1:500           |
| LAMP2                                                | Mouse          | DSHB #H4B4-c                     | 1:1000          |
| mTOR                                                 | Rabbit         | Cell signaling #2972             | 1:1000          |
| PDI                                                  | Rabbit         | Abcam # ab3672                   | 1:1000          |
| P70S6K                                               | Mouse          | Cell signaling #9202             | 1:1000          |
| p-S10-histone H3                                     | Rabbit         | Cell signaling #3377             | 1:5000          |
| p-S2448-mTOR                                         | Rabbit         | Cell signaling #2971             | 1:1000          |
| p-T389-P70S6K                                        | Rabbit         | Cell signaling #9206             | 1:1000          |
| Rab7a                                                | Rabbit         | Abcam #ab137029                  | 1:1000          |
| TFEB                                                 | Rabbit         | Cell signaling #4240S            | 1:1000          |
| Tom20                                                | Rabbit         | Santa cruz # sc-11415            | 1:3000          |
| VDAC                                                 | Rabbit         | Cell signaling # 12454S          | 1:1000          |
| V-ATPase V1 B1/2                                     | Mouse          | Santa cruz # sc-271832           | 1:1000          |
| V-ATPase V0 d1                                       | Rabbit         | Abcam #ab202899                  | 1:2000          |
| Rabbit anti-mouse IgG HRP-coupled Secondary Antibody |                | Dako #P0260                      | 1:10000         |
| Goat anti-rabbit IgG HRP-coupled Secondary Antibody  |                | Thermo Fischer Scientific #31470 | 1:10000         |
| Rabbit anti-rat IgG HRP-coupled Secondary Antibody   |                | Dako #P0450                      | 1:10000         |

**Table S2.** Internal lipid standards

| Lipid class                 | Sum formula                                 | Source     | ID      | Amount added (pmol) |
|-----------------------------|---------------------------------------------|------------|---------|---------------------|
| FA                          | FA 16:0-D4                                  | TRC-Canada | P145502 | 24                  |
| DAG                         | DAG 12:0/12:0                               | Avanti     | 800812  | 8                   |
| TAG                         | TAG 17:0/17:0/17:0                          | Larodan    | 33-1700 | 24.39               |
| PA and PA O-                | PA 12:0/12:0                                | Avanti     | 840635  | 16.34               |
| PC and PC O-                | PC 12:0/12:0                                | Avanti     | 850335  | 20                  |
| PE and PE O-                | PE 12:0/12:0                                | Avanti     | 850702  | 20                  |
| PG and PG O-                | PG 12:0/12:0                                | Avanti     | 840435  | 11.03               |
| BMP                         | BMP 14:0/14:0                               | Avanti     | 110857  | 12                  |
| PI and PI O-                | PI 8:0/8:0                                  | Avanti     | 850181  | 10.89               |
| PS and PS O-                | PS 12:0/12:0                                | Avanti     | 840038  | 6.63                |
| CL                          | CL 14:0/14:0/14:0/14:0                      | Avanti     | 710332  | 20                  |
| LPA and LPA O-              | LPA 17:0                                    | Avanti     | 11067   | 17.64               |
| LPC and LPC O-              | LPC 12:0                                    | Avanti     | 855475  | 16                  |
| LPE and LPE O-              | LPE 13:0                                    | Avanti     | 110696  | 17.36               |
| LPG and LPG O-              | LPG 17:1                                    | Avanti     | 858127  | 10.46               |
| LPI and LPI O-              | LPI 13:0                                    | Avanti     | 110716  | 11.28               |
| LPS and LPS O-              | LPS 17:1                                    | Avanti     | 858141  | 14.72               |
| Ceramide-1-phosphate (CerP) | CerP 18:1;2/12:0;0                          | Avanti     | 860531  | 16                  |
| Ceramide (Cer)              | Cer 18:1;2/12:0;0                           | Avanti     | 860512  | 16                  |
| SHexCer                     | SHexCer 18:1;2/12:0;0                       | Avanti     | 860573  | 16                  |
| HexCer                      | HexCer 18:1;2/12:0;0                        | Avanti     | 860543  | 20                  |
| diHexCer                    | diHexCer 18:1;2/17:0;0                      | Avanti     | 860595  | 9.84                |
| triHexCer                   | triHexCer18:1;2/17:0;0                      | Larodan    | 56-1061 | 12                  |
| GM3                         | GM3 18:1;2/18:0;0-D3                        | Larodan    | 71-1107 | 26                  |
| GM2                         | GM2 18:1;2/18:0;0-D3                        | Larodan    | 71-1200 | 26                  |
| GM1                         | GM1 18:1;2/18:0;0-D3                        | Larodan    | 71-1101 | 26                  |
| LHexCer                     | GluSph- <sup>13</sup> C <sub>6</sub> 18:1;2 | Larodan    | 78-4018 | 16                  |
| LSM                         | LSM 17:1;2                                  | Avanti     | 110752  | 16                  |
| SM                          | SM 18:1;2/12:0;0                            | Avanti     | 860583  | 13.62               |
| Cholesterol                 | Chol-D4                                     | QMX        | D-6359  | 196.25              |
| CE                          | CE-D7 15:0                                  | Avanti     | 700144  | 17.78               |

**Table S3.** Precursor ion, fragment ion and neutral loss for lipid identification

| Lipid class                                     | Mode                  | MS1:<br>Precursor ion             | MS2:<br>Fragment ion                                        | MS2:<br>Neutral loss                                                      | MS2:<br><i>m/z</i> | MS2: Species<br>specifics   |
|-------------------------------------------------|-----------------------|-----------------------------------|-------------------------------------------------------------|---------------------------------------------------------------------------|--------------------|-----------------------------|
| FA                                              | NEG                   | [M-H] <sup>-</sup>                |                                                             |                                                                           |                    |                             |
| DAG                                             | POS                   | [M+NH <sub>4</sub> ] <sup>+</sup> |                                                             | [Fatty acid – H + NH <sub>4</sub> ]                                       |                    | All                         |
| PA, PA O <sup>-</sup> , LPA, LPA O <sup>-</sup> | NEG                   | [M-H] <sup>-</sup>                | [Glycerophosphate – H – H <sub>2</sub> O] <sup>-</sup>      |                                                                           | 152.9958           | All                         |
|                                                 |                       | [M-H] <sup>-</sup>                | [Fatty acid – H] <sup>-</sup>                               |                                                                           | *                  | PA, PA O <sup>-</sup> , LPA |
|                                                 |                       | [M-H] <sup>-</sup>                | [Fatty acid O <sup>-</sup> – H] <sup>-</sup>                |                                                                           | *                  | PA O <sup>-</sup>           |
| PC, PC O <sup>-</sup> , SM, LSM                 | POS                   | [M+H] <sup>+</sup>                | [Phosphorylcholine + H] <sup>+</sup>                        |                                                                           | 184.0733           | All                         |
| LPC, LPC O <sup>-</sup>                         | NEG                   | [M-H] <sup>-</sup>                | [Fatty acid – H] <sup>-</sup>                               |                                                                           | *                  | LPC                         |
| PE, PE O <sup>-</sup> , LPE, LPE O <sup>-</sup> | NEG                   | [M-H] <sup>-</sup>                | [Ethanolaminephosphate – H – H <sub>2</sub> O] <sup>-</sup> |                                                                           | 196.038            | All                         |
|                                                 |                       | [M-H] <sup>-</sup>                | [Fatty acid – H] <sup>-</sup>                               |                                                                           | *                  | PE, PE O <sup>-</sup> , LPE |
|                                                 |                       | [M-H] <sup>-</sup>                | [Fatty acid O <sup>-</sup> – H] <sup>-</sup>                |                                                                           | *                  | PE O <sup>-</sup>           |
| BMP/PG, LPG, LPG O <sup>-</sup>                 | NEG                   | [M-H] <sup>-</sup>                | [Glycerophosphate – H – H <sub>2</sub> O] <sup>-</sup>      |                                                                           | 152.9958           | All                         |
|                                                 |                       | [M-H] <sup>-</sup>                | [Fatty acid – H] <sup>-</sup>                               |                                                                           | *                  | BMP/PG, LPG                 |
| PI, PI O <sup>-</sup> , LPI, LPI O <sup>-</sup> | NEG                   | [M-H] <sup>-</sup>                | [Glycerophosphate – H – H <sub>2</sub> O] <sup>-</sup>      |                                                                           | 152.9958           | All                         |
|                                                 |                       | [M-H] <sup>-</sup>                | [Inositolphosphate – H – H <sub>2</sub> O] <sup>-</sup>     |                                                                           | 241.0119           | All                         |
|                                                 |                       | [M-H] <sup>-</sup>                | [Fatty acid – H] <sup>-</sup>                               |                                                                           | *                  | PI, PI O <sup>-</sup> , LPI |
|                                                 |                       | [M-H] <sup>-</sup>                | [Fatty acid O <sup>-</sup> – H] <sup>-</sup>                |                                                                           | *                  | PI O <sup>-</sup>           |
| PS, PS O <sup>-</sup> , LPS, LPS O <sup>-</sup> | NEG                   | [M-H] <sup>-</sup>                | [Glycerophosphate – H – H <sub>2</sub> O] <sup>-</sup>      |                                                                           | 152.9958           | All                         |
|                                                 |                       | [M-H] <sup>-</sup>                |                                                             | [C <sub>3</sub> H <sub>5</sub> NO <sub>2</sub> ]<br>$\Delta m/z$ : 87.032 |                    | All                         |
|                                                 |                       | [M-H] <sup>-</sup>                | [Fatty acid – H] <sup>-</sup>                               |                                                                           | *                  | PS, PS O <sup>-</sup> , LPS |
|                                                 |                       | [M-H] <sup>-</sup>                | [Fatty acid O <sup>-</sup> – H] <sup>-</sup>                |                                                                           | *                  | PS O <sup>-</sup>           |
| CL                                              | NEG                   | [M1-2H] <sup>2-</sup>             | [Fatty acid – H] <sup>-</sup>                               |                                                                           | *                  | All                         |
| Cer, HexCer, di-HexCer, triHexCer               | POS                   | [M+H] <sup>+</sup>                | [LCB + H – H <sub>2</sub> O] <sup>+</sup>                   |                                                                           | *                  | All                         |
|                                                 |                       | [M+H] <sup>+</sup>                | [LCB + H – 2H <sub>2</sub> O] <sup>+</sup>                  |                                                                           | *                  | All                         |
| LHexCer                                         | POS                   | [M+H] <sup>+</sup>                | [LCB + H – 2H <sub>2</sub> O] <sup>+</sup>                  |                                                                           | *                  | All                         |
| CerP                                            | NEG                   | [M-H] <sup>-</sup>                | [Phosphoric acid – H – H <sub>2</sub> O] <sup>-</sup>       |                                                                           | 78.959             | All                         |
| SHexCer                                         | NEG                   | [M-H] <sup>-</sup>                | [HO <sub>4</sub> S] <sup>-</sup>                            |                                                                           | 96.9601            | All                         |
| GM3, GM2, GM1                                   | NEG                   | [M-H] <sup>-</sup>                | [NeuAc – H] <sup>-</sup>                                    |                                                                           | 290.0864           | All                         |
| CE                                              | POS                   | [M+NH <sub>4</sub> ] <sup>+</sup> | [Chol – NH <sub>3</sub> – H <sub>2</sub> O] <sup>+</sup>    |                                                                           | 369.3516           | All                         |
| Chol                                            | POS<br>(SIM/<br>tPRM) | [M+NH <sub>4</sub> ] <sup>+</sup> | [Chol – NH <sub>3</sub> – H <sub>2</sub> O] <sup>+</sup>    |                                                                           | 369.3516           | All                         |

\* Depends on species.
